# Supplementary material for: A Story of PA/BSA and Biomarkers to Diagnose Pulmonary Hypertension in Patients with Severe Aortic Valve Stenosis—The Rise of IGF-BP2 and GDF-15
Source: MDPI journal article supplement (doi:10.3390/jcdd10010022), 2023-01-05
Supplement: s1 [file s1]

## Estimation of sample size

**Formula:**

$$\text{Estimated sample size} = \frac{z^2 * p(1-p)}{\epsilon^2}$$

z = confidence level

p = sample proportion

$\epsilon$  = margin of error

**Version 1:** Estimated sample size = 385

- z = 1.96
- p = 0.5
- $\epsilon$  = 0.05

**Version 2:** Estimated sample size = 273

- z = 1.65
- p = 0.5
- $\epsilon$  = 0.05

**Version 3:** Estimated sample size = 97

- z = 1.96
- p = 0.5
- $\epsilon$  = 0.10

**Version 4:** Estimated sample size = 69

- z = 1.65
- p = 0.5
- $\epsilon$  = 0.10

**Average of all versions:** Estimated sample size = 206
